# Supplementary material
Source: PubMed Central journal article supplement (PMC7705424)
Supplement: annrheumdis-2020-219279supp001.pdf [file annrheumdis-2020-219279supp001.pdf]

## SUPPLEMENTAL MATERIALS

**Supplemental Table 1.** Rheumatic Disease Terms Used to Identify Patients with Rheumatic Disease and Their Associated ICD-9 and ICD-10 Codes.

| Category                           | Rheumatic Disease (ICD codes)                                                                                                                                                                                                                                                                                                                                                                                                                                                                                                                                                                |
|------------------------------------|----------------------------------------------------------------------------------------------------------------------------------------------------------------------------------------------------------------------------------------------------------------------------------------------------------------------------------------------------------------------------------------------------------------------------------------------------------------------------------------------------------------------------------------------------------------------------------------------|
| Inflammatory arthritis             | <ul style="list-style-type: none"> <li>● Rheumatoid arthritis (M05%, M06%, 714%)</li> <li>● Inflammatory arthritis or inflammatory polyarthropathy (M06.4, 714.89, 714.9)</li> <li>● Juvenile idiopathic arthritis (M08.20, 714.3)</li> <li>● Psoriatic arthritis or arthropathic psoriasis (L40.50, 696.0)</li> <li>● Ankylosing spondylitis (M45.9, 720.0)</li> </ul>                                                                                                                                                                                                                      |
| Vasculitis                         | <ul style="list-style-type: none"> <li>● ANCA-associated vasculitis: granulomatosis with polyangiitis, eosinophilic granulomatosis with polyangiitis, microscopic polyangiitis (M31.3, M31.7, M30.0, 446.0, 446.4, 446.7, 447.6)</li> <li>● Kawasaki disease (M30.3, 446.1)</li> <li>● Takayasu arteritis (M31.4, 446.7)</li> <li>● Polyarteritis nodosa (M30.0, 446.0)</li> <li>● Giant cell arteritis/polymyalgia rheumatica (M31.6, 446.5, M35.3, 725%)</li> <li>● Behçet's disease (M35.2, 136.1)</li> <li>● Unspecified arteritis (I77.6, 447.6)</li> </ul>                             |
| Other Systemic Autoimmune Diseases | <ul style="list-style-type: none"> <li>● Systemic lupus erythematosus (M32%, 710.0)</li> <li>● Sjögren's syndrome (M35.0, 710.2)</li> <li>● Idiopathic inflammatory myositis: dermatomyositis, polymyositis, statin-associated autoimmune myositis, unspecified myositis (G72.49, G72.41, M33, 710.3, 710.4)</li> <li>● Systemic sclerosis (M34.0, M34.1, M34.8%, M34.9, 710.1)</li> <li>● Mixed connective tissue disease (M35.1, 710.9)</li> <li>● Antiphospholipid syndrome (D68.61, 239.81)</li> <li>● Sarcoidosis (D86.0, D86.9, 135%)</li> <li>● IgG4-related disease (M35)</li> </ul> |

ICD: International Classification of Disease 9<sup>th</sup> or 10<sup>th</sup> revision codes. % indicates a wild character to capture all instances of a given code.
